# Supplementary material for: Expectancy-Value-Cost motivational theory to explore final year medical students’ research intentions and past research experience: a multicentre cross-sectional questionnaire study
Source: bioRxiv or medRxiv preprint supplement (doi:10.1101/2021.01.04.20244038), 2021-01-04
Supplement: Supplementary file [file media-3.pdf]

### APPENDIX 3 - SPEARMAN'S RANK-ORDER CORRELATIONS RESULTS

Table - Spearman's rank-order correlation results

|                                               | Consid <sup>N</sup> | Apprec <sup>Y</sup> | A        | E        | V        | C        |
|-----------------------------------------------|---------------------|---------------------|----------|----------|----------|----------|
| Considered doing research <sup>N</sup>        | 1.000               |                     |          |          |          |          |
| Research experience appreciation <sup>Y</sup> |                     | 1.000               |          |          |          |          |
| Awareness (A)                                 | 0.346**             | 0.581**             | 1.000    |          |          |          |
| Expectancy for success (E)                    | 0.430**             | 0.626**             | 0.522**  | 1.000    |          |          |
| Value (V)                                     | 0.640**             | 0.633**             | 0.565**  | 0.661**  | 1.000    |          |
| Cost (C)                                      | -0.445**            | -0.422**            | -0.368** | -0.581** | -0.611** | 1.000    |
| Intention (I)                                 | 0.695**             | 0.573**             | 0.545**  | 0.670**  | 0.894**  | -0.624** |

<sup>N</sup> n = 125 (students without research experience) <sup>Y</sup> n = 70 (students with research experience)

\*\* correlation is significant at 0.01 level (two-tailed)
